# Supplementary material for: Improving the saccharification efficiency of lignocellulosic biomass using a bio-inspired two-stage microreactor system loaded with complex enzymes
Source: Royal Society of Chemistry journal article supplement (doi:10.1039/d2gc02965k), 2022-01-01
Supplement: d2gc02965k1.pdf [file d2gc02965k1.pdf]

## Supplementary Material

### **Improving saccharification efficiency of lignocellulosic biomass using a bio-inspired two-stage microreactor system loaded with complex enzymes**

Ao Xia <sup>a,b</sup>, Kai Lin <sup>a,b</sup>, Tong Zhu <sup>a,b</sup>, Yun Huang <sup>a,b</sup>, Xianqing Zhu <sup>a,b</sup>, Xun Zhu <sup>a,b</sup>, Kaiyong Cai <sup>c</sup>, Zidong Wei <sup>d</sup>, Qiang Liao <sup>a,b,\*</sup>

<sup>a</sup> Key Laboratory of Low-grade Energy Utilization Technologies and Systems, Chongqing University, Ministry of Education, Chongqing 400044, China

<sup>b</sup> Institute of Engineering Thermophysics, School of Energy and Power Engineering, Chongqing University, Chongqing 400044, China

<sup>c</sup> Key Laboratory of Biorheological Science and Technology, Ministry of Education, College of Bioengineering, Chongqing University, Chongqing 400044, China

<sup>d</sup> School of Chemistry and Chemical Engineering, Chongqing University, Chongqing 400044, China

\* Corresponding author.

Prof. Qiang Liao, Tel. +86 23 65102479, E-mail: [lqzx@cqu.edu.cn](mailto:lqzx@cqu.edu.cn)

**Table S1** Particle size distribution of wheat straw pretreated by ball milling.

| <b>Samples<sup>a</sup></b> | <b>D<sub>0.1</sub> (µm)</b> | <b>D<sub>0.5</sub> (µm)</b> | <b>D<sub>0.9</sub> (µm)</b> |
|----------------------------|-----------------------------|-----------------------------|-----------------------------|
| Ball milling for 18 h      | 0.81±0.03                   | 3.38±0.19                   | 10.55±2.76                  |
| Ball milling for 24 h      | 0.83±0.03                   | 3.12±0.10                   | 8.48±0.53                   |
| Ball milling for 30 h      | 0.66±0.01                   | 3.06±0.07                   | 14.35±1.62                  |

<sup>a</sup> D<sub>0.1</sub>, D<sub>0.5</sub>, and D<sub>0.9</sub> represent 10%, 50% or 90% percentiles of the total volume.

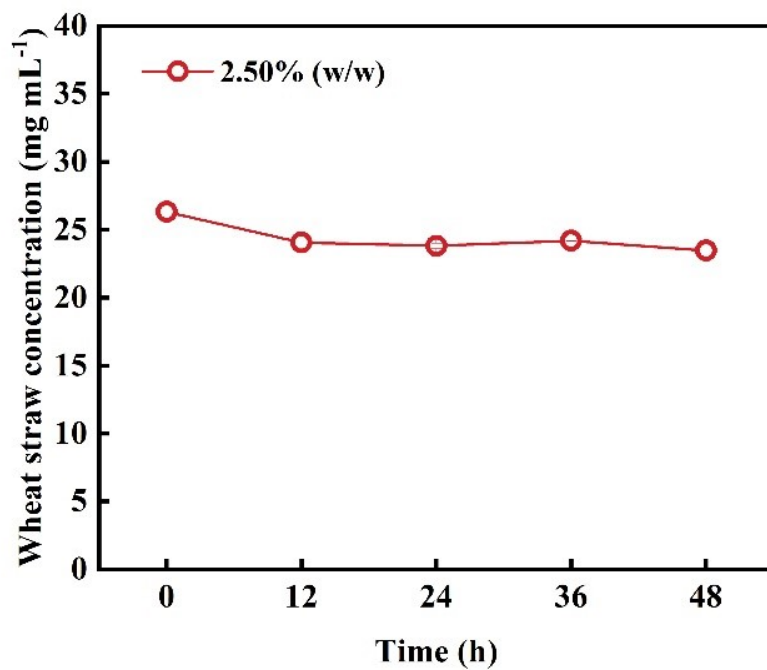

**Fig. S1.** The extended-time static sedimentation characteristics of wheat straw pretreated by ball milling for 24 h.

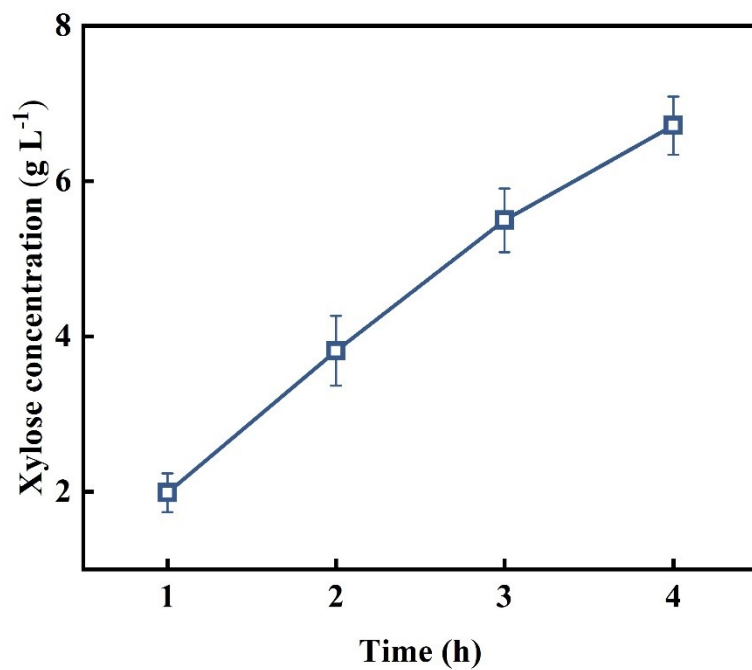

**Fig. S2.** Xylose production from 2.5% (w/v) xylan using cellulase Cellic CTec2.

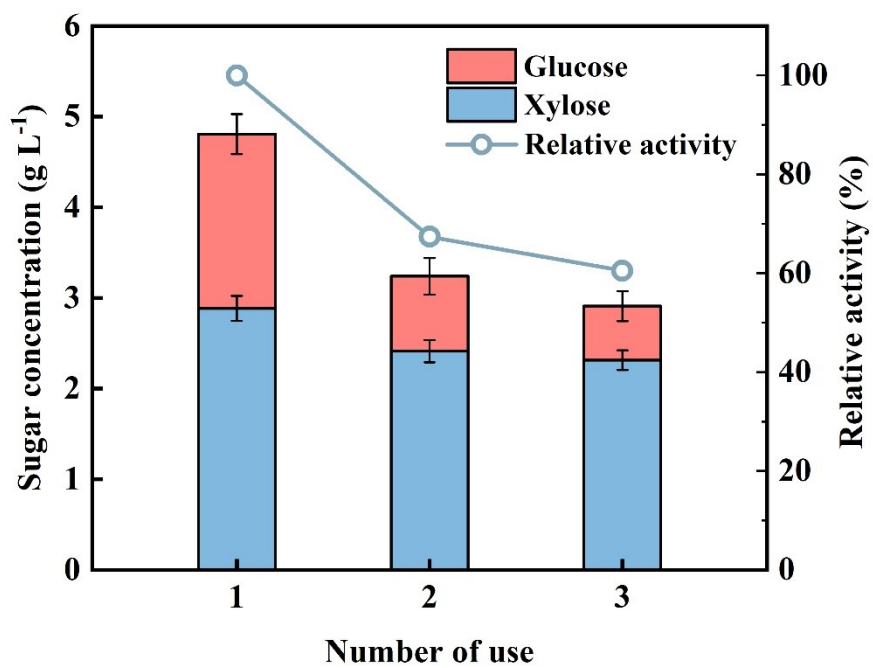

**Fig. S3.** Conversion characteristics of wheat straw in a two-stage microreactor during the reuse process.
